# Supplementary material
Source: PubMed Central journal article supplement (PMC5858472)
Supplement: ba009068-suppl1.pdf [file ba009068-suppl1.pdf]

1 **Figure S1**

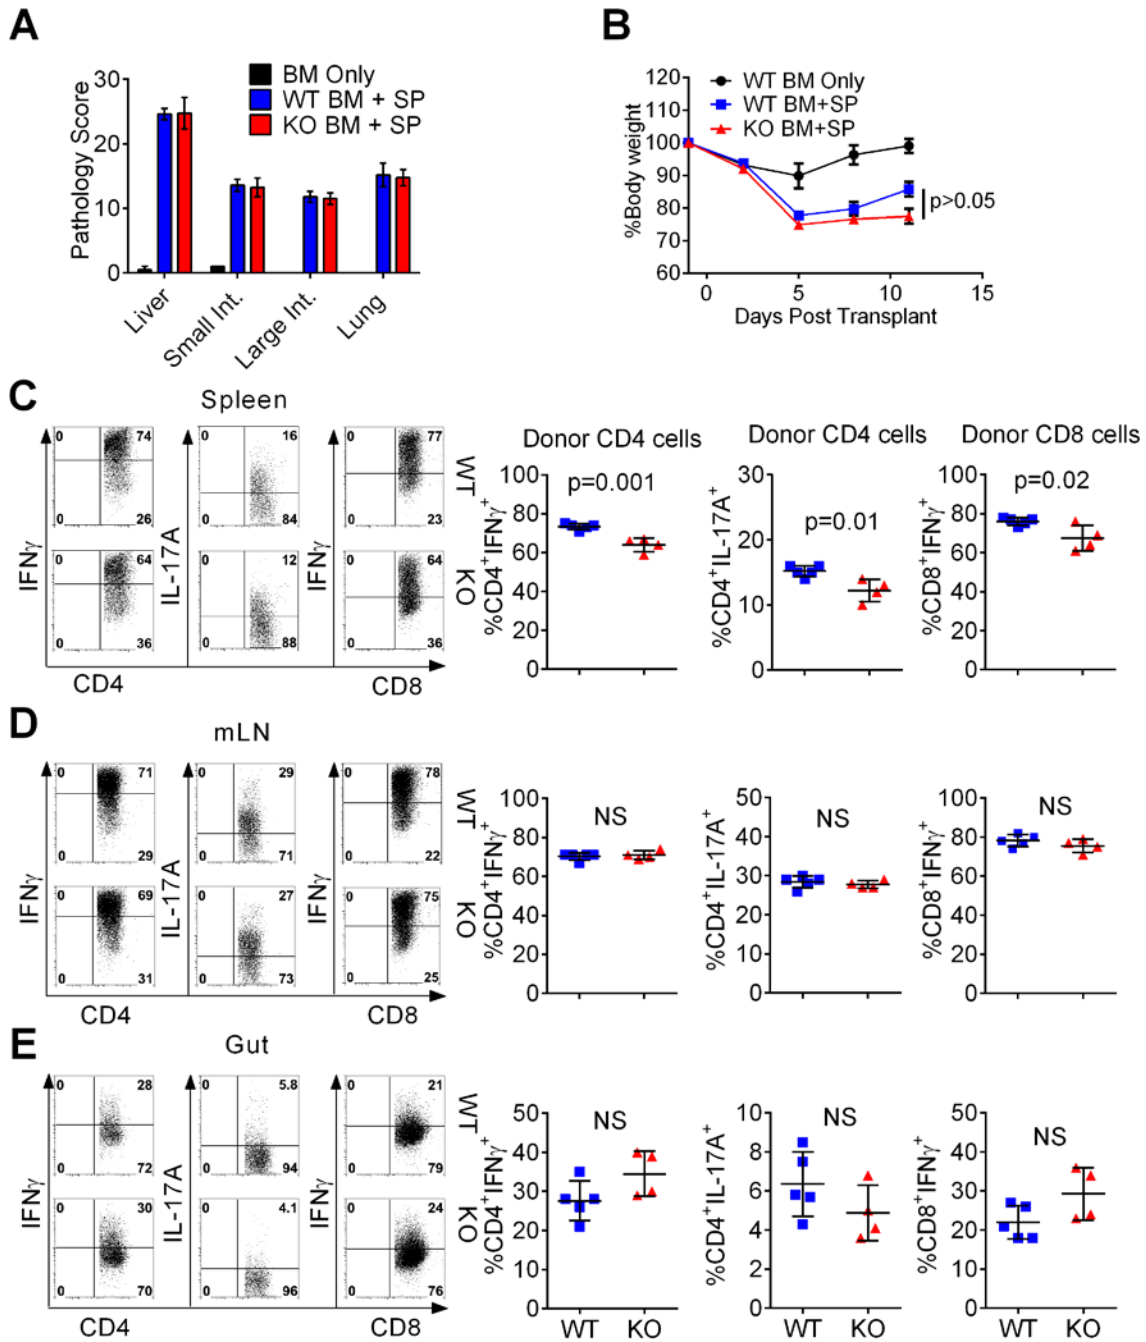

2 **Figure S1. XBP-1 in B cells is dispensable for acute GVHD development.** Lethally irradiated  
 3 B6D2F1 mice were transplanted with TCD-BM at  $5 \times 10^6$  per mouse alone or together with  
 4  $10 \times 10^6$  whole splenocytes from XBP-1<sup>flx/flx</sup>CD19<sup>Cre-</sup> (n=5) or XBP-1<sup>flx/flx</sup>CD19<sup>Cre+</sup>

1 (n=5) donors on a B6 background. Fourteen days post transplant, recipient mice were euthanized  
2 and indicated tissues were stained for H&E and analyzed for acute GVHD histological scores by  
3 an independent pathologist (**A**). Recipients were monitored twice weekly for body weight loss  
4 beginning after transplant until day 12 (**B**). Indicated statistical analysis was performed using a  
5 paired t test of the entire experimental time-course. IFN $\gamma$  producing CD4 and CD8, and IL-17A  
6 producing CD4 cells were analyzed by flow cytometry from spleens (**C**), mesenteric lymph  
7 nodes (**D**), and isolated lymphocytes from gut (**E**). Quantified flow cytometry data from each  
8 organ and T-cell subset are shown after each representative flow cytometry diagram. Data were  
9 collected from n=11 mice from one representative experiment.

10

11

12

13

14

15

16

17

18

19

1 **Figure S2**

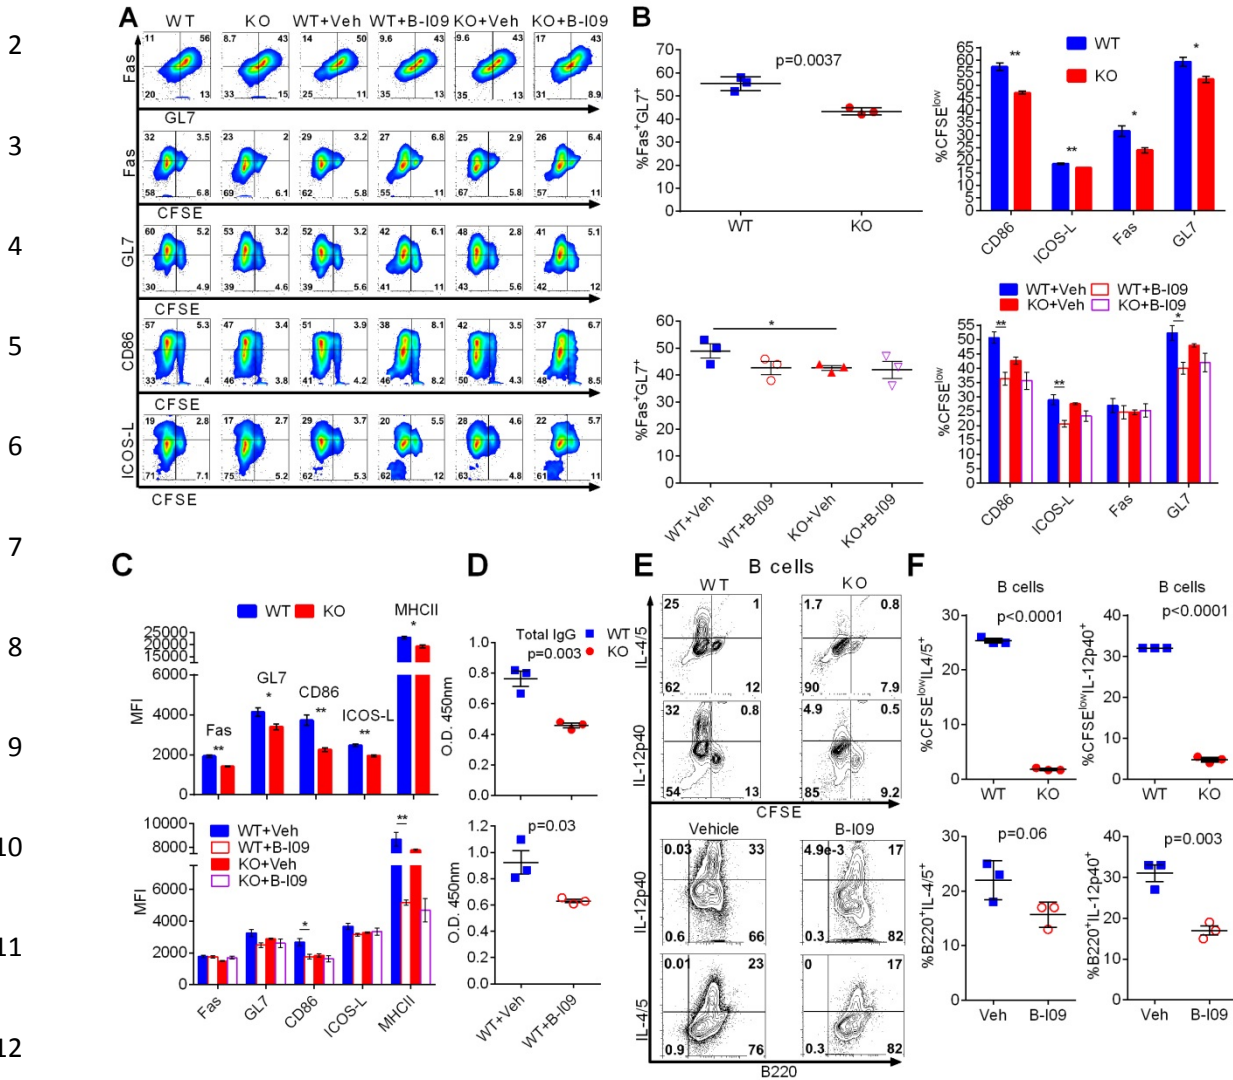

13 **Figure S2. XBP-1 is required for B-cell activation and differentiation.** B cells were purified  
 14 from XBP-1 WT or XBP-1 KO mice and left un-manipulated or CFSE labeled, and cultured at 2  
 15  $\times 10^5$  cells/ml for 4 days in the presence of LPS (10  $\mu$ g/ml) and IL-4 (10 ng/ml). Some B cells  
 16 were treated with B-109 (10-20  $\mu$ M) or vehicle (DMSO). On day 4, B cells were stained for Fas,  
 17 GL7, CD86, ICOS-L, and MHCII against CFSE (A). Percentages of Fas<sup>+</sup>GL7<sup>+</sup> GC B cells and  
 18 percentages of Fas, GL7, CD86, and ICOS-L expressed on CFSE<sup>low</sup> proliferated B cells are  
 19 quantified, and statistics of WT+Veh and KO+Veh were calculated using a one-tailed student's *t*

1 test in **(B)**. Median fluorescence intensity of indicated cell surface markers on gated B cells from  
2 XBP-1 WT vs. XBP-1 KO groups (top) or XBP-1 WT or XBP-1 KO cells treated with either  
3 vehicle or B-I09 (bottom) are quantified in **(C)**. Culture supernatants were extracted on Day 4,  
4 and used in ELISA to determine levels of secreted total IgG relative to unstimulated B-cell  
5 control supernatants **(D)**. On Day 4, B cells were stained intracellularly for IL-4, IL-5, and IL-  
6 12p40 cytokines with representative flow plots **(E)** and subsequent quantifications shown **(F)**.  
7 Data are representative of two similar experiments.

8

9

10

11

12

13

14

15

16

17

18

1 **Figure S3**

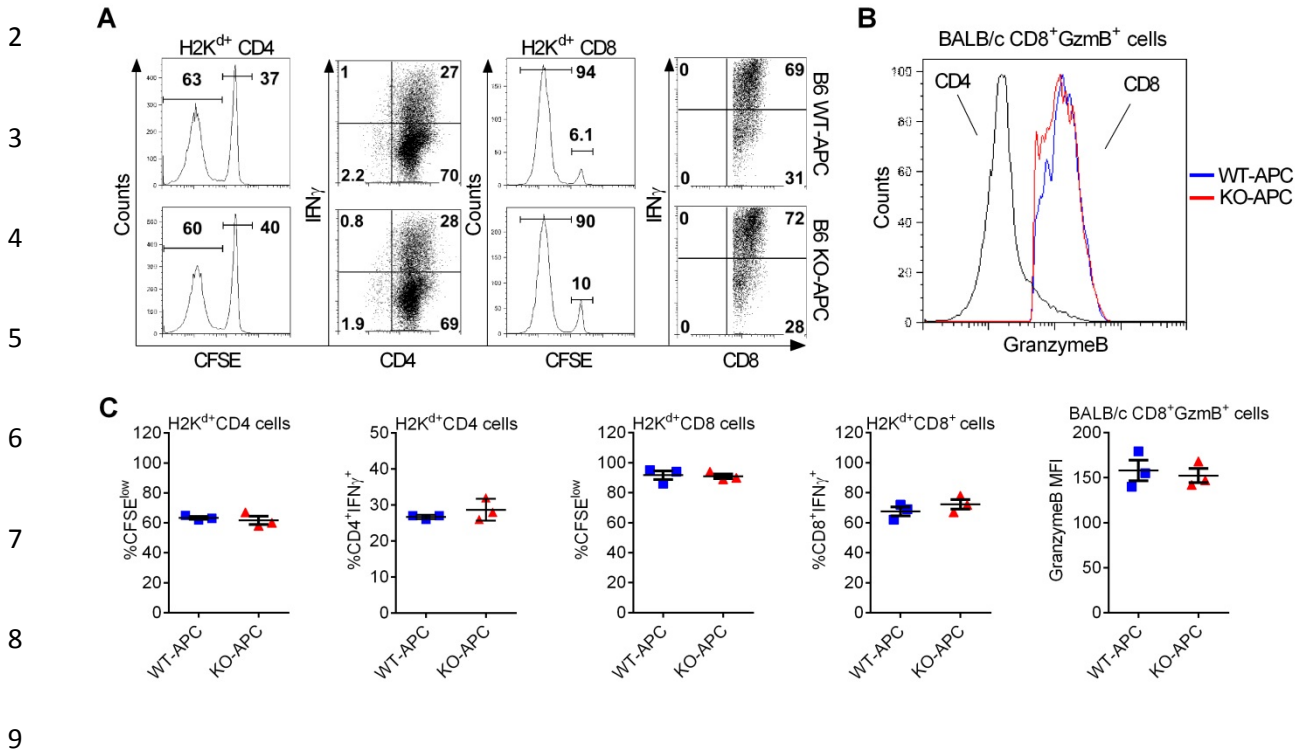

10 **Figure S3. XBP-1 in B cells is dispensable for early costimulation and activation of T cells.**

11 Naïve B cells were purified from spleens of XBP-1 WT or XBP-1 KO mice. Low-dose LPS

12 activated (1 µg/ml for 48h) B cells were used to stimulate allogeneic CFSE labeled T cells from

13 BALB/c mice at 3:1 B:T-cell ratio. After 3 days of co-culture with LPS activated B cells, T cells

14 were harvested and analyzed for proliferation and IFN $\gamma$  cytokine production (**A**) as well as

15 production of Granzyme B (**B**) where the black line indicates Granzyme B expression on CD4

16 gated cells (negative control), blue and red lines indicate Granzyme B expression on gated CD8

17 T cells activated by WT or XBP-1 KO B cells, respectively. Accumulated data are quantified in

18 (**C**). Data shown are representative of two similar experiments.
